# Supplementary material for: Novel Target Exploration from Hypothetical Proteins of Klebsiella pneumoniae MGH 78578 Reveals a Protein Involved in Host-Pathogen Interaction
Source: Front Cell Infect Microbiol. 2020 Apr 3;10:109. doi: 10.3389/fcimb.2020.00109 (PMC7146069; doi:10.3389/fcimb.2020.00109)
Supplement: Supplementary File 6 — Mapped ENH proteins on STRING PPI data. [file Data_Sheet_6.xlsx]

## Sheet: Sheet1
Supplementary file 6: Mapped ENH proteins on STRING PPI data
	queryItem	stringId	identity	bitscore	preferredName	Annotation
	lcl|NC_009648.1_prot_WP_002888808.1_137	573.JG24_30090	100	227.3	JG24_30090	Predicted chaperone lipoprotein YacC, potentially involved in protein secretion; Derived by automated computational analysis using gene prediction method: Protein Homology
	lcl|NC_009648.1_prot_WP_002890061.1_310	573.JG24_03720	99	477.2	JG24_03720	CFA/I fimbrial chaperone; Derived by automated computational analysis using gene prediction method: Protein Homology
	lcl|NC_009648.1_prot_WP_002890284.1_350	573.JG24_03930	100	192.2	ppnP	Pyrimidine/purine nucleoside phosphorylase; Catalyzes the phosphorolysis of diverse nucleosides, yielding D-ribose 1-phosphate and the respective free bases. Can use uridine, adenosine, guanosine, cytidine, thymidine, inosine and xanthosine as substrates. Also catalyzes the reverse reactions
	lcl|NC_009648.1_prot_WP_002898708.1_1078	573.JG24_07865	100	57.8	JG24_07865	Derived by automated computational analysis using gene prediction method: Protein Homology
	lcl|NC_009648.1_prot_WP_002911528.1_2552	573.JG24_16115	98	422.5	JG24_16115	Predicted 4-deoxy-L-threo-5-hexosulose-uronate ketol-isomerase; Derived by automated computational analysis using gene prediction method: Protein Homology
	lcl|NC_009648.1_prot_WP_002914983.1_3227	573.JG24_19925	100	198.4	JG24_19925	PTS system, cellobiose-specific IIA component; Derived by automated computational analysis using gene prediction method: Protein Homology
	lcl|NC_009648.1_prot_WP_002918629.1_3861	573.JG24_23135	100	181.8	JG24_23135	Probable ribonuclease inhibitor YPO3690; Derived by automated computational analysis using gene prediction method: Protein Homology
	lcl|NC_009648.1_prot_WP_004143718.1_1956	573.JG24_12910	100	57.4	JG24_12910	Conidiation-specific protein 10; Derived by automated computational analysis using gene prediction method: Protein Homology
	lcl|NC_009648.1_prot_WP_004150795.1_1202	573.JG24_08750	179	58.5	JG24_08750	Conidiation-specific protein 10; Derived by automated computational analysis using gene prediction method: Protein Homology
	lcl|NC_009648.1_prot_WP_004151327.1_478	573.JG24_04600	99	533.1	JG24_04600	Derived by automated computational analysis using gene prediction method: Protein Homology
	lcl|NC_009648.1_prot_WP_004176857.1_755	573.JG24_06055	85	390.2	JG24_06055	Derived by automated computational analysis using gene prediction method: Protein Homology
	lcl|NC_009648.1_prot_WP_004222859.1_295	573.JG24_03660	99	394.8	JG24_03660	Probable lipoprotein nlpC; Derived by automated computational analysis using gene prediction method: Protein Homology
	lcl|NC_009648.1_prot_WP_012068456.1_736	573.JG24_05945	95	211.5	JG24_05945	Hypothetical lipoprotein ybfN; Derived by automated computational analysis using gene prediction method: Protein Homology
	lcl|NC_009648.1_prot_WP_073549749.1_1062	573.JG24_07585	98	630.6	JG24_07585	Member of the betaine, carnitine, choline transporter (BCCT) family; unknown function; Derived by automated computational analysis using gene prediction method: Protein Homology

## Sheet: Sheet2
_WP_002888808.1_137
_WP_002890061.1_310
_WP_002890284.1_350
_WP_002898708.1_1078
_WP_002911528.1_2552
_WP_002914983.1_3227
_WP_002918629.1_3861
_WP_002920130.1_3944
_WP_004143718.1_1956
_WP_004150795.1_1202
_WP_004151327.1_478
_WP_004176857.1_755
_WP_004222859.1_295
_WP_012068456.1_736
_WP_073549749.1_1062
