# Supplementary material for: Novel Target Exploration from Hypothetical Proteins of Klebsiella pneumoniae MGH 78578 Reveals a Protein Involved in Host-Pathogen Interaction
Source: Front Cell Infect Microbiol. 2020 Apr 3;10:109. doi: 10.3389/fcimb.2020.00109 (PMC7146069; doi:10.3389/fcimb.2020.00109)
Supplement: Supplementary File 7 — Calculated physicochemical properties of the identified essential non-homologous proteins. [file Data_Sheet_7.xlsx]

## Sheet: Protparam
Supplementary file 7: Calculated physicochemical properties of the identified essential non-homologous proteins
Protein ID	No. of a.a.	Molecular Weight	Theoretical pI	Total number of negatively charged residues (Asp + Glu)	Total number of positively charged residues (Arg + Lys)	Instability index	Aliphatic index	Grand average of hydropathicity (GRAVY)
WP_002888808.1	115	12887.7	6.18	12	12	33.02	91.74	-0.122
WP_004222859.1	188	21424.4	9.17	19	23	43.99	70.05	-0.513
WP_002890061.1	236	26550.4	9.67	25	35	47.09	81.36	-0.394
WP_002890284.1	94	10178.4	4.51	11	5	34.52	71.49	-0.095
WP_004151327.1	264	29163.8	5.24	28	21	38.97	105.38	0.005
WP_012068456.1	110	12285.1	8.63	12	15	47.4	72.82	-0.594
WP_004176857.1	218	24372	5.06	30	23	62.15	92.48	-0.23
WP_023288894.1	81	9188.38	5.55	10	8	49	90.49	-0.526
WP_073549749.1	320	35235.6	7.75	18	19	34.08	109.31	0.587
WP_002898708.1	57	5953.27	10.15	7	11	19.44	10.53	-1.733
WP_004150795.1	61	6282.58	9.69	8	11	16.71	9.84	-1.738
WP_041937616.1	178	20158.2	6.11	24	22	39.74	93.26	-0.21
WP_004143718.1	61	6226.56	9.6	9	12	18.17	9.84	-1.693
WP_002911528.1	212	23211.7	5.81	22	19	24.5	90.66	-0.012
WP_002914983.1	104	11431.1	5.21	15	8	37.74	99.71	-0.031
WP_002918629.1	91	10748	4.28	20	9	66.96	86.92	-0.46
WP_015959101.1	217	23139.6	6.79	22	21	36.26	101.75	0.048
